# Supplementary material
Source: PubMed Central journal article supplement (PMC4370366)
Supplement: NIHMS666168-supplement-Supporting.pdf [file NIHMS666168-supplement-Supporting.pdf]

# Supporting Information

## Lead(II) Complex Formation with *L*-Cysteine in Aqueous Solution

*Farideh Jalilehvand*<sup>a,\*</sup>, *Natalie S. Sisombath*<sup>a</sup>, *Adam C. Schell*<sup>a</sup> and *Glenn A. Facey*<sup>b</sup>

<sup>a</sup> Department of Chemistry, University of Calgary, 2500 University Drive NW, Calgary, Alberta  
T2N 1N4, Canada

<sup>b</sup> Department of Chemistry, University of Ottawa, 10 Marie Curie Private, Ottawa, Ontario, K1N  
6N5, Canada

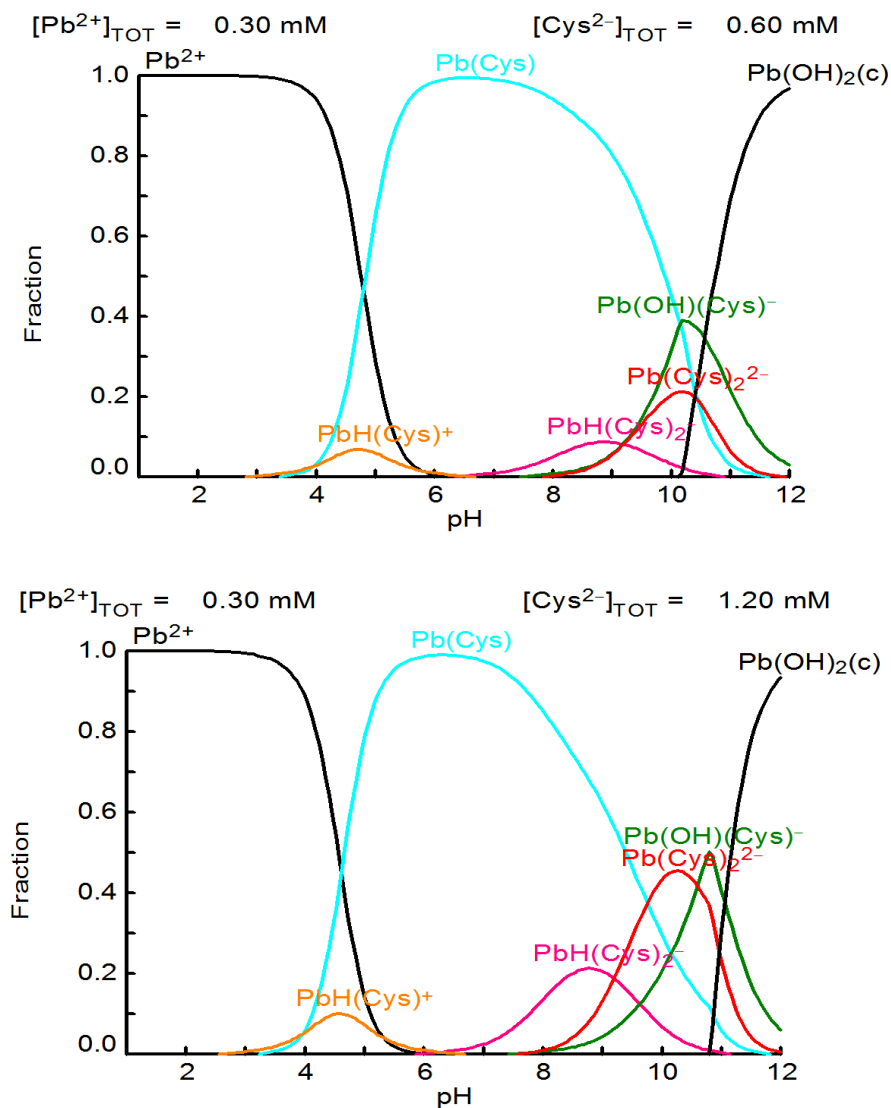

**Figure S-1a.** Distribution diagrams for lead(II) cysteine complexes as a function of pH in solutions containing  $C_{\text{Pb(II)}} = 0.3 \text{ mM}$  and  $\text{H}_2\text{Cys} / \text{Pb(II)}$  mole ratios 2.0 and 4.0, based on the reported formation constants by Bizri et al., calculated at 25 °C in the ionic medium 1.0 M  $\text{NaClO}_4$  [16] for the following aqueous Pb(II)-cysteine complexes:

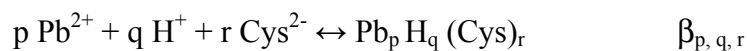

$\text{Pb}(\text{Cys})$  ( $\log \beta_{1, 0, 1} = 12.2$ ),  $\text{Pb}(\text{Cys})(\text{OH})^-$  ( $\log \beta_{1, -1, 1} = 2.04$ ),  $\text{Pb}(\text{Cys})_2^{2-}$  ( $\log \beta_{1, 0, 2} = 15.9$ ),  $\text{Pb}(\text{HCys})(\text{Cys})^-$  ( $\log \beta_{1, 1, 2} = 25.10$ ) and  $\text{Pb}(\text{HCys})^+$  ( $\log \beta_{1, 1, 1} = 16.16$ ).

The solid compound  $\text{PbCys}(\text{c})$  is soluble at such low concentration; however, no solubility product (or formation constant) has been reported.

The distribution diagrams in Figures S-1a were calculated with computer program MEDUSA (<http://www.kemi.kth.se/medusa/>). The full input file to MEDUSA is:

```

3, 17, 4, 0 /MEDUSA, t = 25 C, p = 1
Pb 2+
H+
Cys 2-
H(Cys)-      , 10.19  0 1 1
H2(Cys)      , 18.44  0 2 1
H3(Cys)+     , 20.53  0 3 1
OH-          , -14.0   0 -1 0
PbH(Cys)+    , 16.16  1 1 1
PbH(Cys)2 -  , 25.1   1 1 2
Pb(Cys)      , 12.2   1 0 1
Pb(Cys)2 2-  , 15.9   1 0 2
Pb(OH)(Cys)- , 2.04   1 -1 1
Pb(OH)2      , -17.12 1 -2 0
Pb(OH)3 -    , -28.06 1 -3 0
Pb(OH)4 2-   , -39.7  1 -4 0
Pb2(OH)3+    , -6.36  2 -1 0
Pb3(OH)4 2+  , -23.88 3 -4 0
Pb4(OH)4 4+  , -20.88 4 -4 0
Pb6(OH)8 4+  , -43.61 6 -8 0
PbOH +       , -7.71  1 -1 0
PbCys(c)     , 15.2   1 0 1
Pb(OH)2(c)   , -8.15  1 -2 0
PbO(cr)      , -12.91 1 -2 0
PbO:Pb(OH)2(c), -26.2  2 -4 0
Pb 2+, H+,
T, 0.01
LAV, -1.0 -13.0
T, 0.02

```

*Note:* The formation constant  $\log \beta$  for solid PbCys(c) is an estimated value for this ionic strength ( $I = 1.0$  M). The stability constants for Pb(II) hydroxo complexes (including  $\text{Pb(OH)}_4^{2-}$ ) have been introduced from the database HYDRA in MEDUSA program.

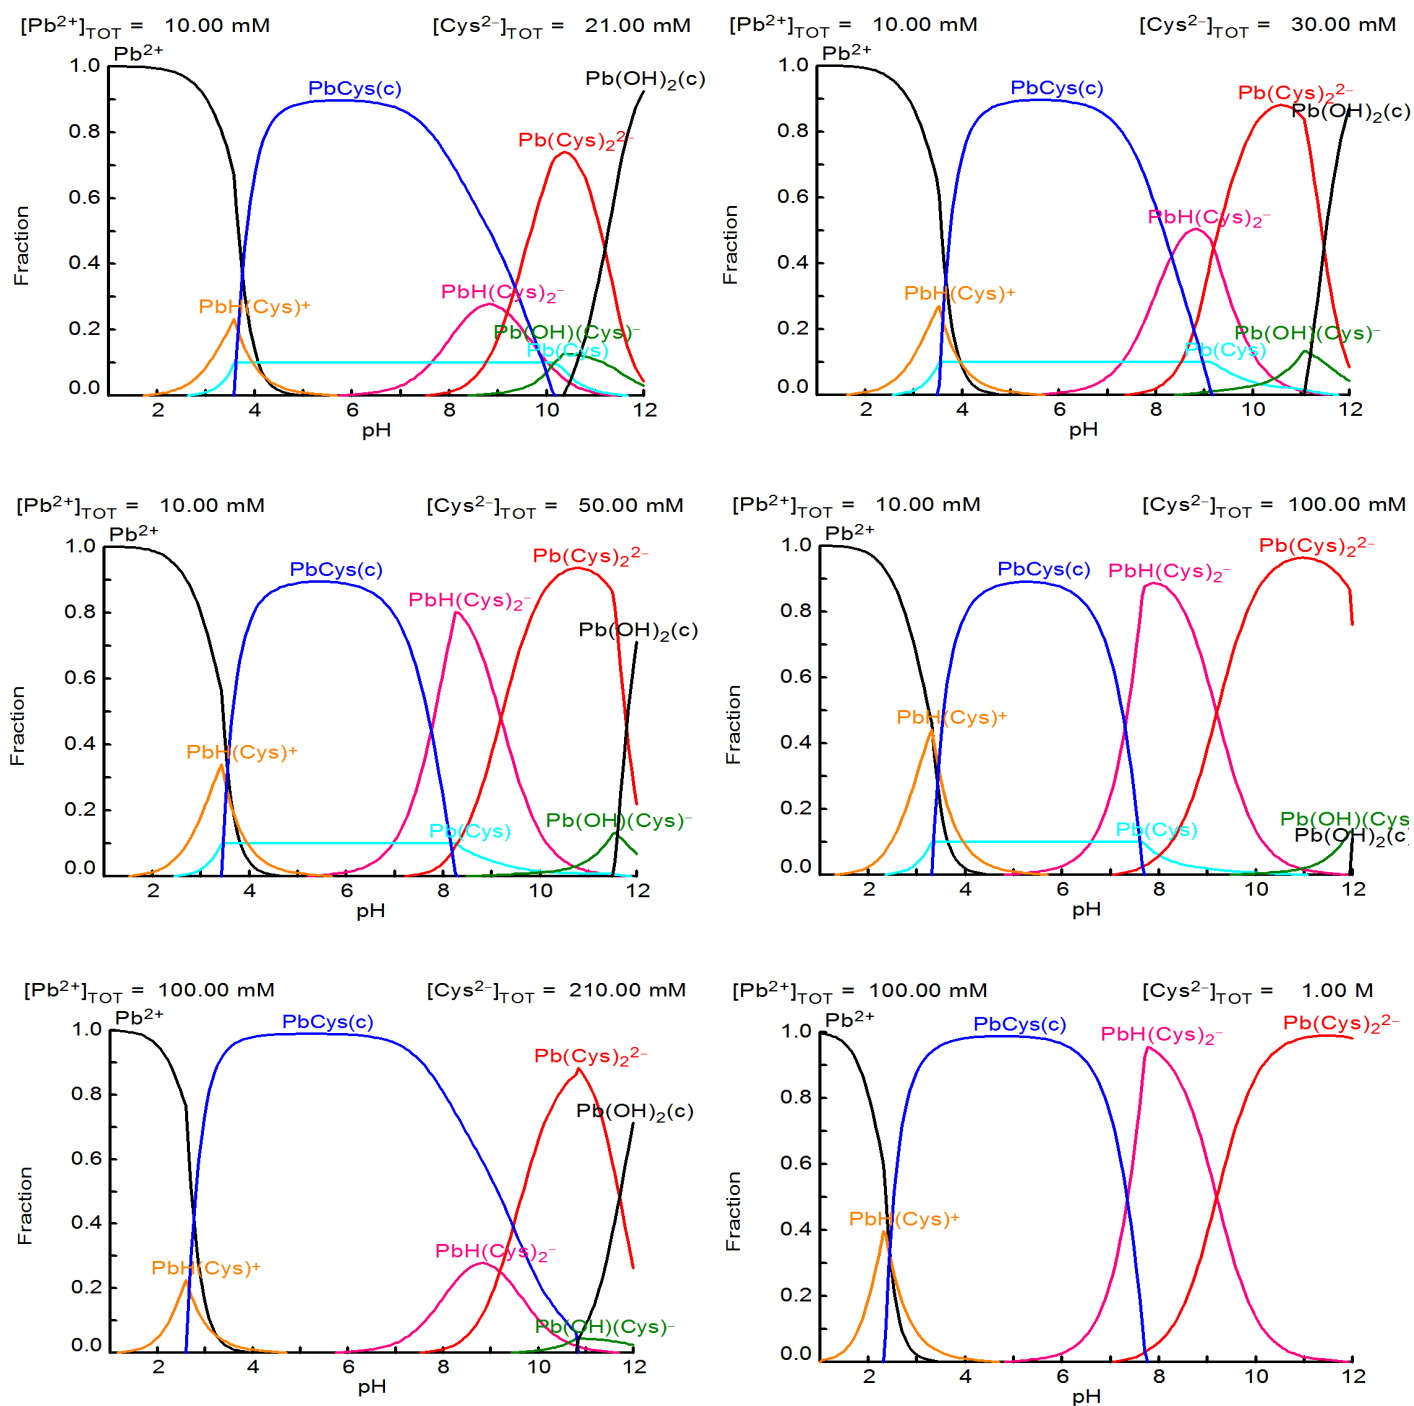

**Figure S-1b.** Distribution diagrams for lead(II) cysteine complexes as a function of pH in solutions containing  $C_{\text{Pb(II)}} \sim 10$  mM or 100 mM, and  $\text{H}_2\text{Cys} / \text{Pb(II)}$  mole ratios 2.1, 3.0, 5.0 or 10.0, based on the reported formation constants for  $I = 1.00$  M by Bizri et al. (used in Figure S-1a) [16]. A tentative solubility product of  $\log K_{\text{sp}} = -15.2$  was estimated for  $\text{PbCys(c)}$ , with formation constant of  $\log \beta = 15.2$ , to represent our experimental observations in the current study, i.e. dissolution of the  $\text{PbCys(c)}$  precipitate at  $\text{pH} = 10.4$  in solutions with  $\text{H}_2\text{Cys}/\text{Pb(II)}$  mole ratio 2.1 (A and A\*), and at  $\text{pH} \leq 9.1$  for those with higher  $\text{H}_2\text{Cys}/\text{Pb(II)}$  mole ratios.

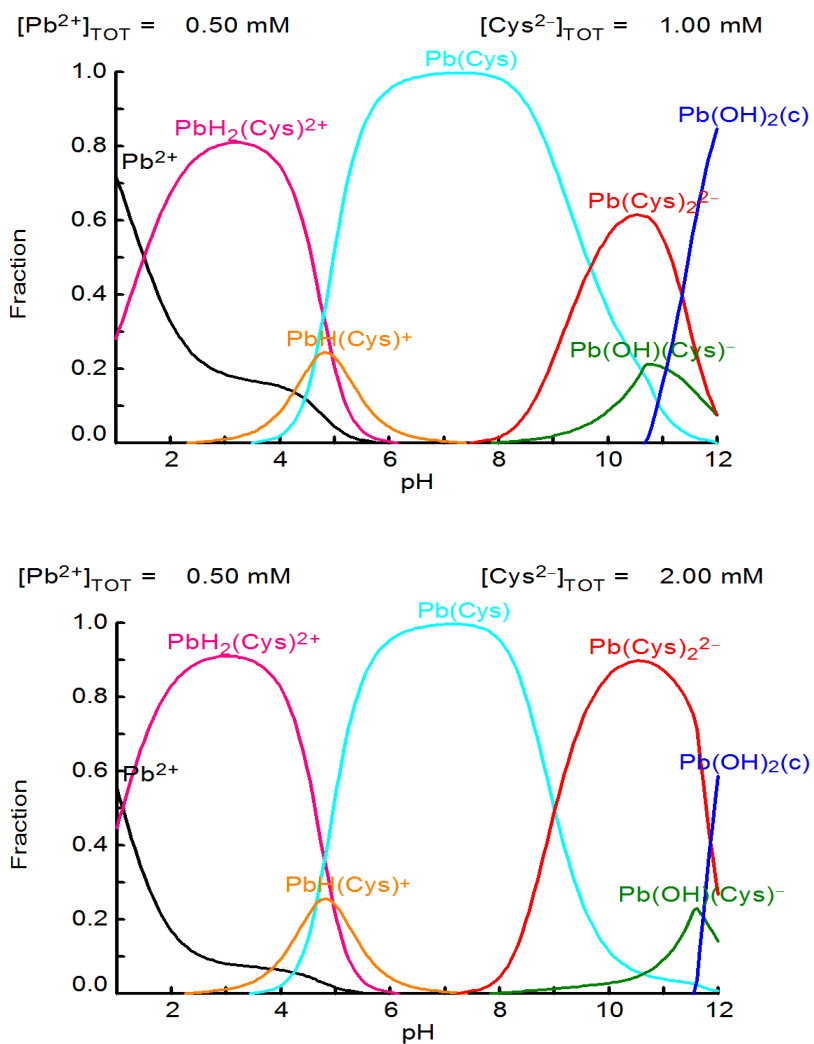

**Figure S-2a.** Distribution diagrams for lead(II) cysteine complexes as a function of pH in solutions containing  $C_{Pb(II)} = 0.5 \text{ mM}$  and  $H_2Cys / Pb(II)$  mole ratios 2.0 and 4.0, based on the reported formation constants by Crea et al., calculated at 25 °C in the ionic medium 0.1 M  $NaNO_3$  [20] for the following aqueous Pb(II)-cysteine complexes:

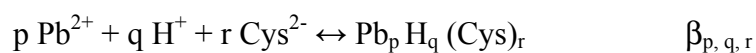

$Pb(Cys)$  ( $\log \beta_{1, 0, 1} = 13.12$ ),  $Pb(Cys)(OH)^-$  ( $\log \beta_{1, -1, 1} = 2.49$ ),  $Pb(Cys)_2^{2-}$  ( $\log \beta_{1, 0, 2} = 17.56$ ),  $Pb(H_2Cys)^{2+}$  ( $\log \beta_{1, 2, 1} = 22.72$ ) and  $Pb(HCys)^+$  ( $\log \beta_{1, 1, 1} = 17.77$ ).

The distribution diagrams in Figure S-2a were calculated with computer program MEDUSA (<http://www.kemi.kth.se/medusa/>). The full input file to MEDUSA is:

```

3, 16, 4, 0 /MEDUSA, t= 25 C, p= 1
Pb 2+
H+
Cys 2-
H(Cys)-      , 10.46  0 1 1
H2(Cys)      , 18.78  0 2 1
H3(Cys)+     , 21.04  0 3 1
OH-          , -14.0   0 -1 0
Pb(Cys)      , 13.12  1 0 1
PbH(Cys)+    , 17.77  1 1 1
PbH2(Cys) 2+ , 22.72  1 2 1
Pb(Cys)2 2-  , 17.56  1 0 2
Pb(OH)(Cys)- , 2.49   1 -1 1
Pb(OH)2      , -17.14 1 -2 0
Pb(OH)3 -    , -28.06 1 -3 0
Pb2(OH) 3+   , -7.08  2 -1 0
Pb3(OH)4 2+  , -23.41 3 -4 0
Pb4(OH)4 4+  , -20.13 4 -4 0
Pb6(OH)8 4+  , -42.86 6 -8 0
PbOH+        , -7.67  1 -1 0
Pb(Cys)(c)   , 16.2   1 0 1
Pb(OH)2(c)   , -8.15  1 -2 0
PbO(cr)      , -12.91 1 -2 0
PbO:Pb(OH)2(c) , -26.2  2 -4 0
Pb 2+, H+,
T, 0.1
LAV, -1.0 -13.0
T, 1.0

```

*Note:* The formation constant  $\log \beta$  for solid PbCys(c) is an estimated value for this ionic strength ( $I = 0.1$  M). The stability constants for Pb(II) hydroxo complexes have been adopted from Table 2 of Crea et al. [20], referring to *Pure Appl. Chem.*, **2009**, *81*, 2425–2476, and do not include the  $\text{Pb(OH)}_4^{2-}$  complex.

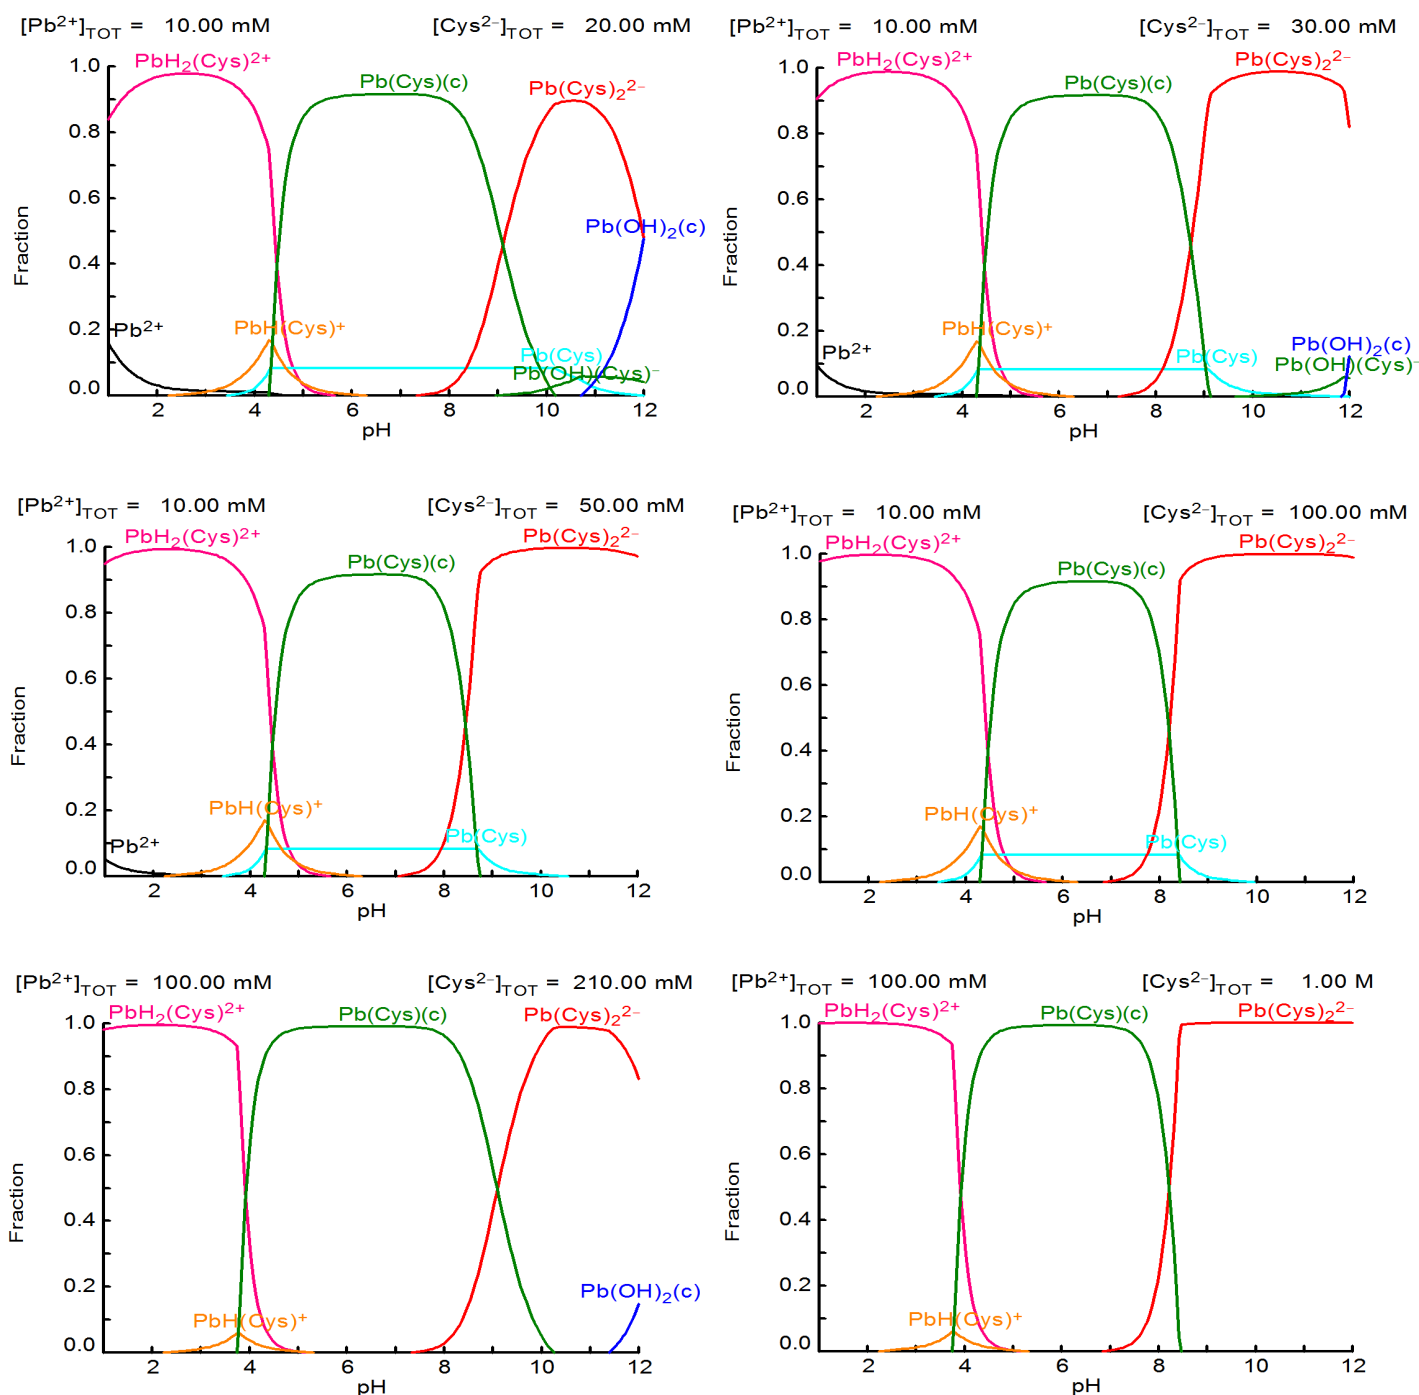

**Figure S-2b.** Distribution diagrams for lead(II) cysteine complexes as a function of pH in solutions containing  $C_{Pb(II)} \sim 10$  mM or 100 mM, and  $H_2Cys / Pb(II)$  mole ratios 2.1, 3.0, 5.0 or 10.0, based on the reported formation constants for  $I = 0.1$  M by Crea et al. (used in Figure S-2a) [20]. A tentative solubility product of  $\log K_{sp} = -16.2$  was estimated for  $PbCys(c)$ , with the formation constant  $\log \beta = 16.2$ , to represent our experimental observations in the current study, i.e. dissolution of  $PbCys(c)$  precipitate at  $pH = 10.4$  in solutions with  $H_2Cys/Pb(II)$  mole ratio 2.1 (A and A\*), and at  $pH \leq 9.1$  for those with higher  $H_2Cys/Pb(II)$  mole ratios.

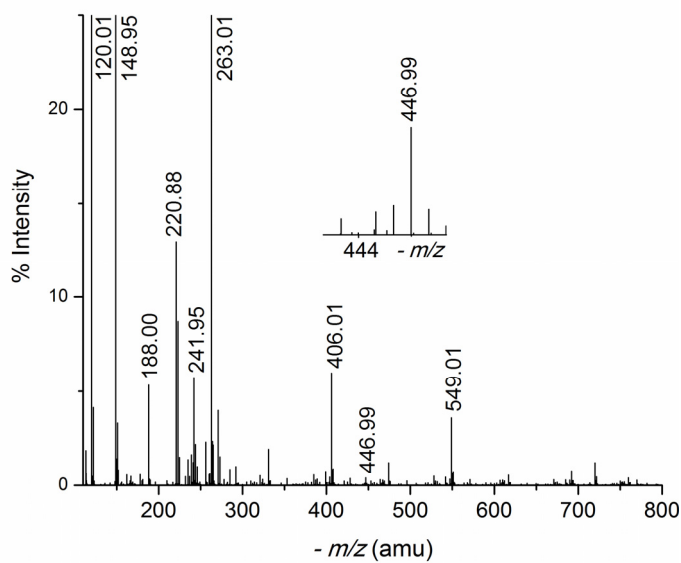

**Figure S-3.** ESI-MS spectrum in negative ion modes for the alkaline Pb(II)-cysteine aqueous solution F, containing  $C_{\text{Pb(II)}} = 10$  mM and  $C_{\text{H}_2\text{Cys}} = 100$  mM, pH = 9.1. The peaks with 100% relative intensity is at  $m/z = 120.01$ , assigned to  $[\text{H}_2\text{Cys} - \text{H}^+]^-$  mass ions (see Table S-1 for peak assignment).

**Table S-1.** Assignment of mass ions observed in ESI-MS spectra (- mode) for Pb(II)-cysteine solutions A, B and F ( $C_{\text{Pb(II)}} = 10$  mM). <sup>a</sup>

| $m/z$ (amu) | assignment                                                 |
|-------------|------------------------------------------------------------|
| 120.01      | $[\text{H}_2\text{Cys} - \text{H}^+]^-$                    |
| 220.88      | $[\text{Na}^+ + 2\text{ClO}_4]^-$                          |
| 241.95      | $[\text{H}_2\text{Cys} - \text{H}^+ + \text{NaClO}_4]^-$   |
| 263.01      | $[\text{Na}^+ + 2\text{H}_2\text{Cys} - 2\text{H}^+]^-$    |
| 406.01      | $[2\text{Na}^+ + 3\text{H}_2\text{Cys} - 3\text{H}^+]^-$   |
| 446.99      | $[\text{Pb}(\text{H}_2\text{Cys})_2 - 3\text{H}^+]^-$      |
| 549.01      | $[3\text{Na}^+ + 4(\text{H}_2\text{Cys}) - 4\text{H}^+]^-$ |

<sup>a</sup>  $\text{H}_2\text{Cys}$  ( $\text{C}_3\text{H}_7\text{NO}_2\text{S}$ );  $m = 121.02$



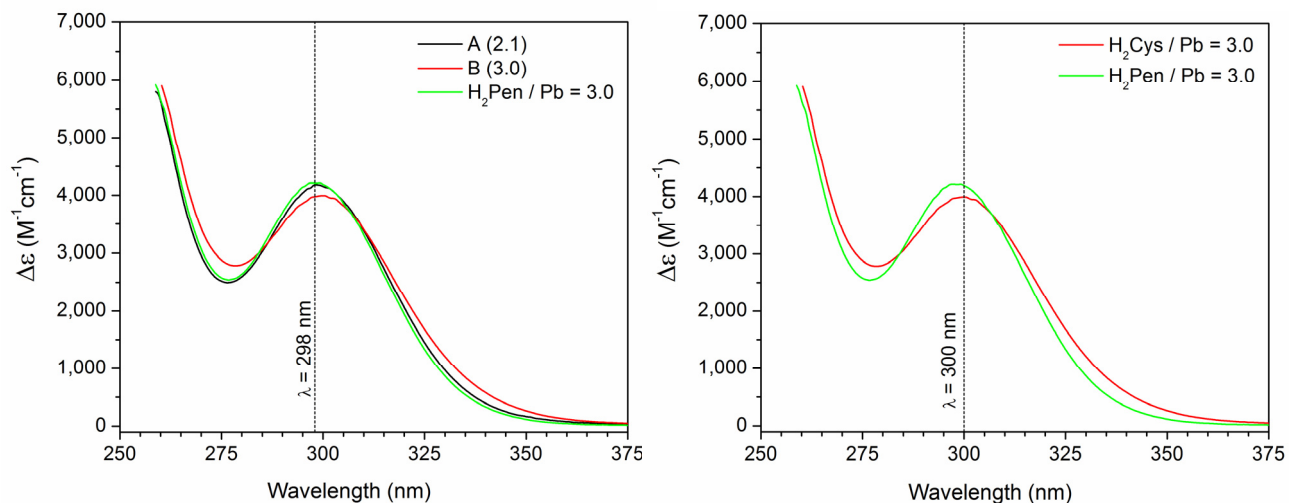

**Figure S-4a.** UV-vis. spectra of the alkaline aqueous Pb(II) cysteine solutions A (pH = 10.4) and B (pH = 9.1) with  $C_{Pb(II)} = 10$  mM and  $H_2Cys / Pb(II)$  mole ratios 2.1 and 3.0, respectively, compared with that of a Pb(II) penicillamine solution with  $C_{Pb(II)} = 10$  mM and  $C_{H_2Pen} = 30$  mM (pH = 9.6) [26]. The shift in  $\lambda_{max}$  is indicated by the vertical lines.

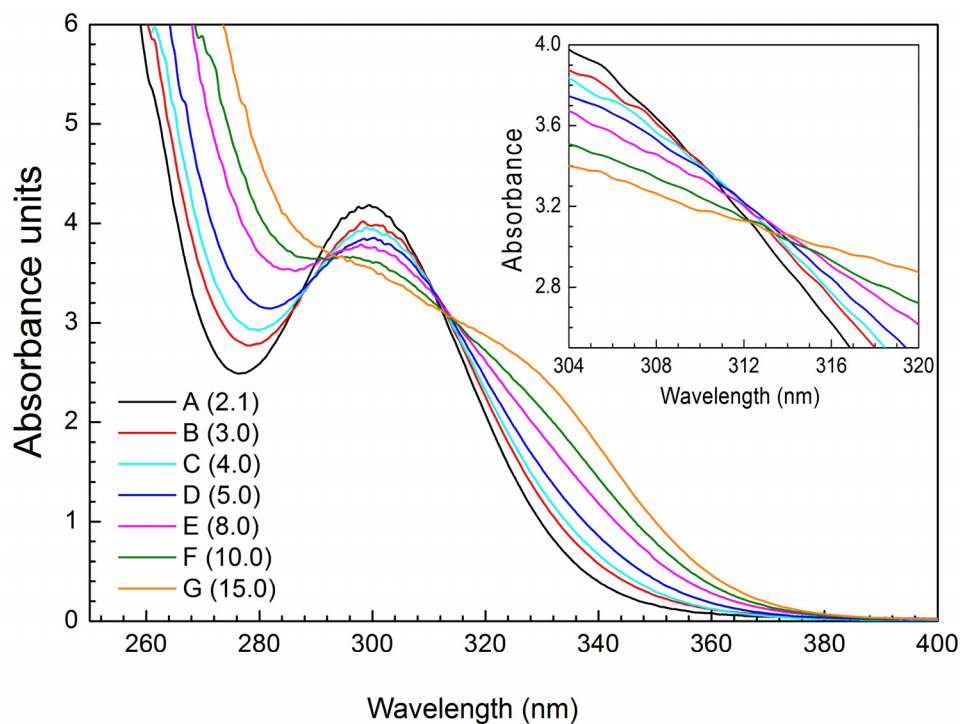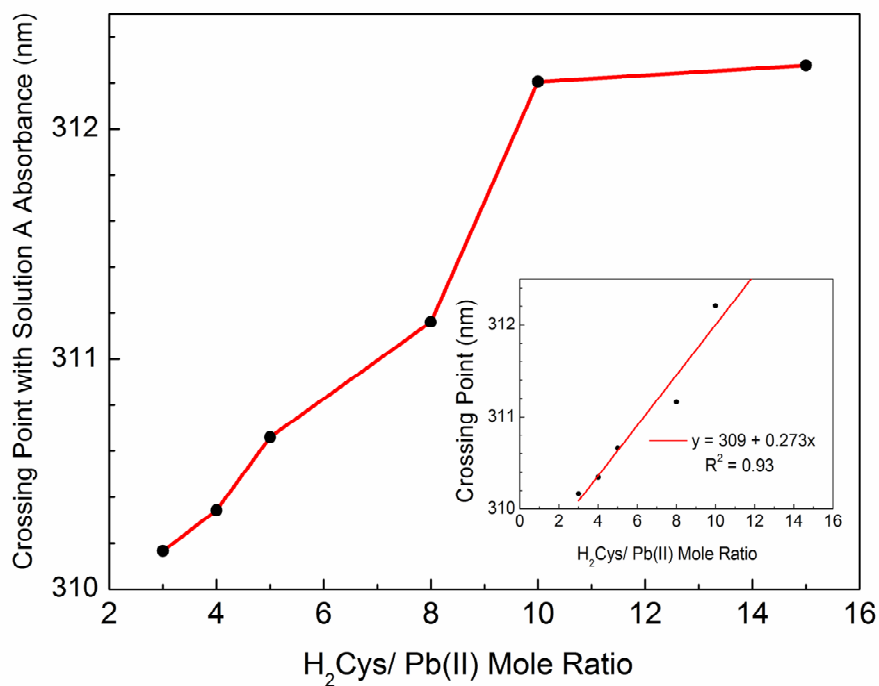

**Figure S-4b.** (Top) UV-vis. spectra of the Pb(II) cysteine solutions A – G (data interval = 0.5 nm), with a close up around 312 nm in inset, showing a systematic movement of the crossing points, spectrum by spectrum. (Below) Wavelengths at which the UV-vis. spectra of solutions B – G cross the absorption spectrum of solution A (inset: linear fit to the points corresponding to H<sub>2</sub>Cys/Pb(II) mole ratios 3 – 10).

**Table S-2.** (Left) Comparing the difference in  $^{13}\text{C}$  NMR chemical shifts ( $\Delta\delta$ ) for Pb(II)-cysteine solutions A – F ( $C_{\text{Pb(II)}} = 10 \text{ mM}$ ) and free cysteine (pH = 9.1); (right)  $^1\text{H}$  NMR chemical shifts ( $\delta_{\text{H}}$ ) for these solutions (see Figure 3)

| Solution | $\Delta\delta$ ( $^{13}\text{C}$ , ppm) |              |              | $\delta$ ( $^1\text{H}$ , ppm) |              |              |
|----------|-----------------------------------------|--------------|--------------|--------------------------------|--------------|--------------|
|          | $\text{C}_1$                            | $\text{C}_2$ | $\text{C}_3$ | $\text{H}_c$                   | $\text{H}_a$ | $\text{H}_b$ |
| A        | 5.0                                     | 4.1          | 4.4          | 4.10                           | 3.66         | 3.50         |
| B        | 1.4                                     | 1.8          | 2.0          | 4.07                           | 3.53         | 3.45         |
| C        | 1.4                                     | 1.7          | 2.0          | 3.94                           | 3.42         | 3.31         |
| D        | 1.0                                     | 1.3          | 1.5          | 3.87                           | 3.34         | 3.23         |
| E        | 0.4                                     | 0.6          | 0.9          | 3.80                           | 3.25         | 3.12         |
| F        | 0.2                                     | 0.4          | 0.7          | 3.76                           | 3.14         | 3.07         |

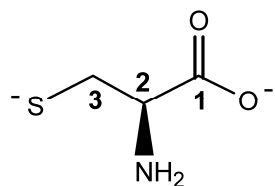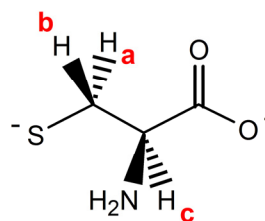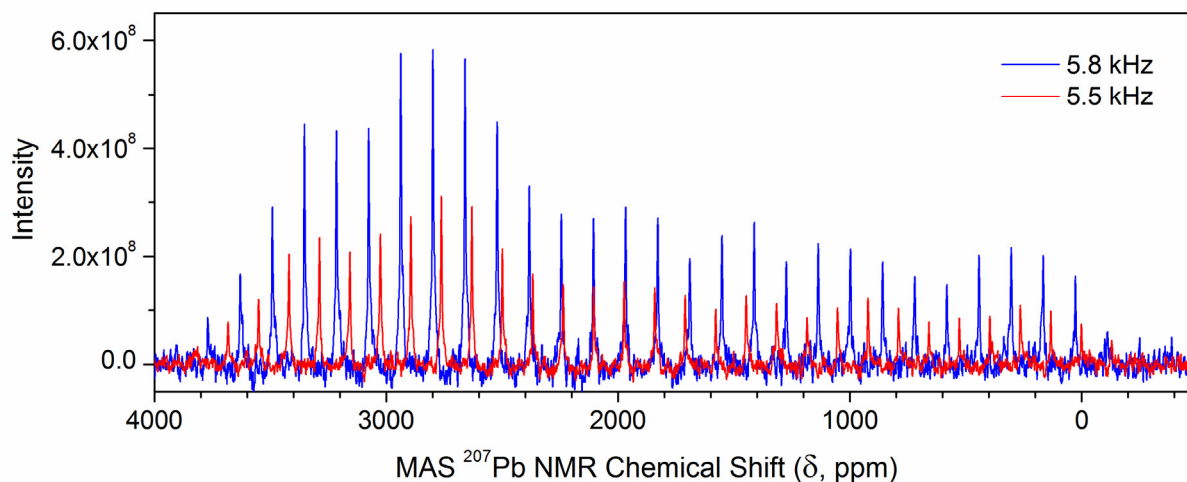

**Figure S-5a.** Overlapping MAS  $^{207}\text{Pb}$  NMR spectra of crystalline  $\text{Pb}(\text{S},\text{N}\text{-aet})_2$  measured at MAS rates 5.5 and 5.8 kHz. The isotropic chemical shift is  $\delta_{\text{iso}} = 2105 \text{ ppm}$ .

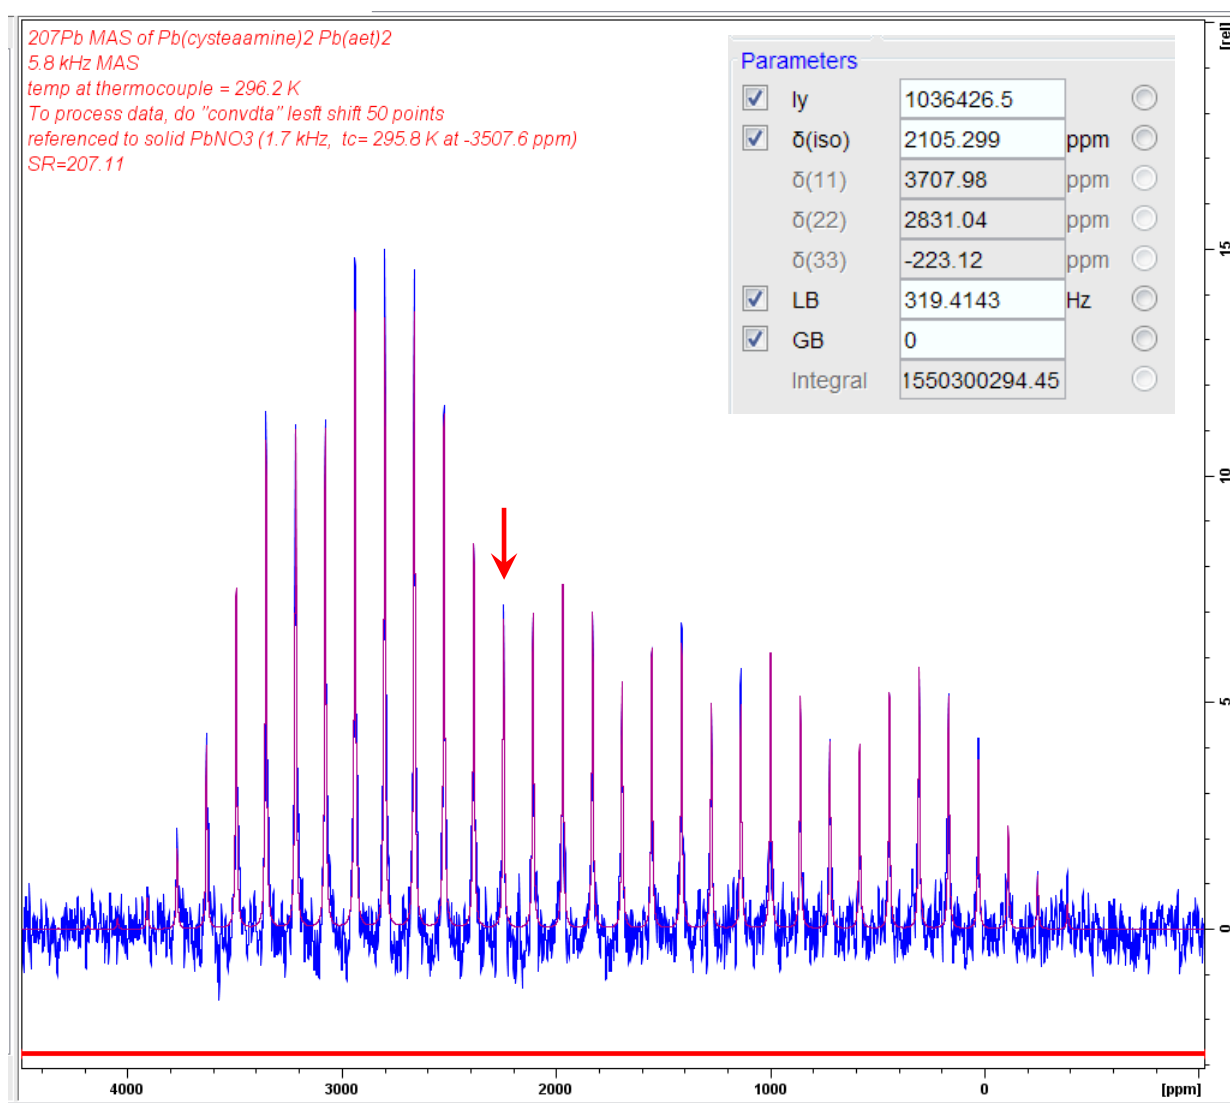

**Figure S-5b.** One-pulse solid state MAS <sup>207</sup>Pb NMR spectrum of crystalline Pb(aet)<sub>2</sub> (spinning at 5.8 kHz; blue), and the reconstructed static <sup>207</sup>Pb NMR powder pattern (pink). The isotropic chemical shift ( $\delta_{\text{iso}} = 2105$  ppm) is shown by an arrow.

$$\delta_{11} = 3707.98 \text{ ppm}; \delta_{22} = 2831.04 \text{ ppm}; \delta_{33} = -223.12 \text{ ppm};$$

$$\delta_{\text{iso}} = 1/3 (\delta_{11} + \delta_{22} + \delta_{33}) = 2105.3 \text{ ppm}$$

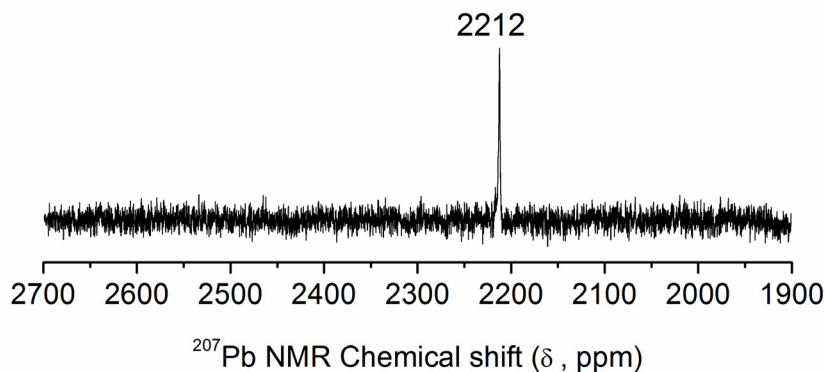

**Figure S-6.**  $^{207}\text{Pb}$  NMR spectrum of an aqueous solution with a Pb(II):cysteamine mole ratio 1:3 (10%  $\text{D}_2\text{O}$ , pH = 10.1,  $C_{\text{Pb(II)}} = 76$  mM) prepared by dissolving  $\text{Pb}(S,N\text{-aet})_2$  in a solution containing the same number of Haet moles.

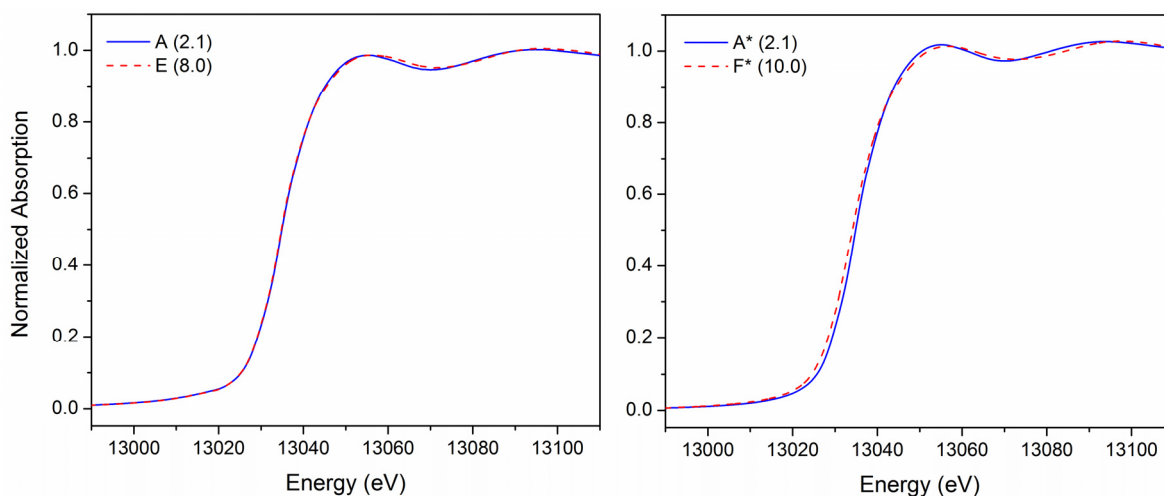

**Figure S-7.** Pb  $L_{\text{III}}$ -edge XANES spectra compared for Pb(II)-cysteine alkaline solutions A and E ( $C_{\text{Pb(II)}} = 10$  mM), and for solutions A\* and F\* ( $C_{\text{Pb(II)}} = 100$  mM). The  $\text{H}_2\text{Cys}/\text{Pb(II)}$  mole ratios are shown in brackets.

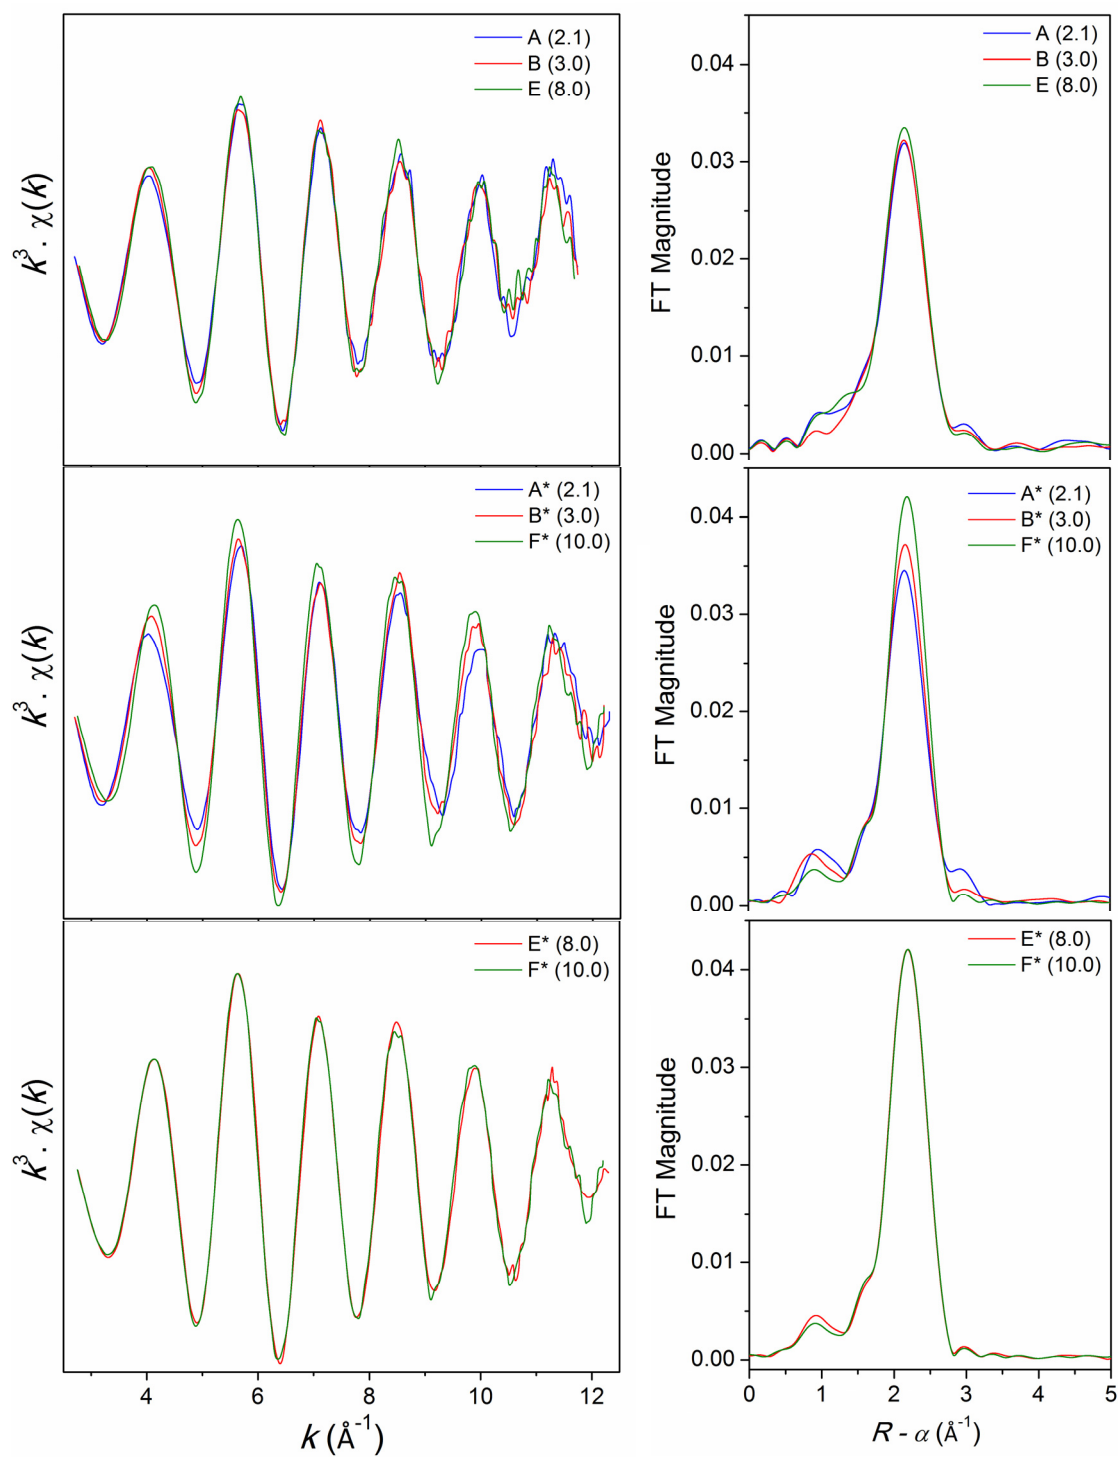

**Figure S-8.** Pb L<sub>III</sub>-edge  $k^3$ -weighted EXFAS oscillations, and the corresponding Fourier-transforms, compared for Pb(II)-cysteine alkaline solutions A – E ( $C_{\text{Pb(II)}} = 10$  mM), and A\* – F\* ( $C_{\text{Pb(II)}} = 100$  mM). The H<sub>2</sub>Cys/Pb(II) mole ratios are shown in brackets.

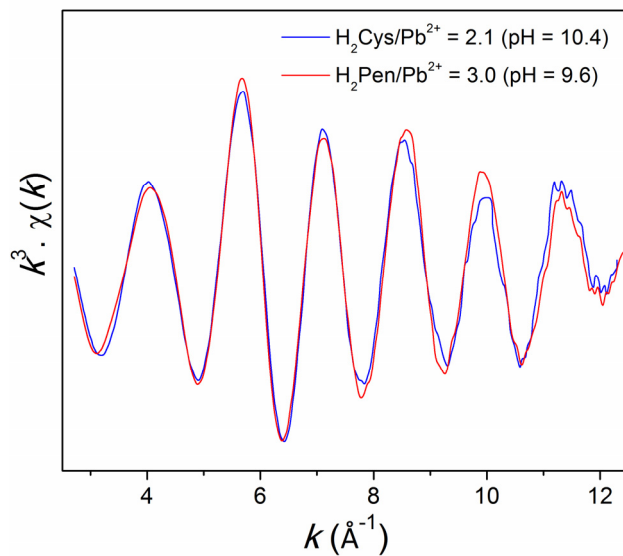

**Figure S-9.** Comparison between  $k^3$ -weighted Pb L<sub>III</sub>-edge EXAFS spectra of the lead(II) cysteine aqueous solution A\* ( $C_{\text{Pb(II)}} = 100$  mM,  $C_{\text{H}_2\text{Cys}} = 210$  mM, pH = 10.4), and that of a Pb(II) penicillamine solution ( $C_{\text{Pb(II)}} = 100$  mM,  $C_{\text{H}_2\text{Pen}} = 300$  mM, pH = 9.6) with  $[\text{Pb}(\text{S},\text{N},\text{O}-\text{Pen})(\text{S}-\text{H}_n\text{Pen})]^{2-n}$  ( $n = 0 - 1$ ) as the dominating species [26].

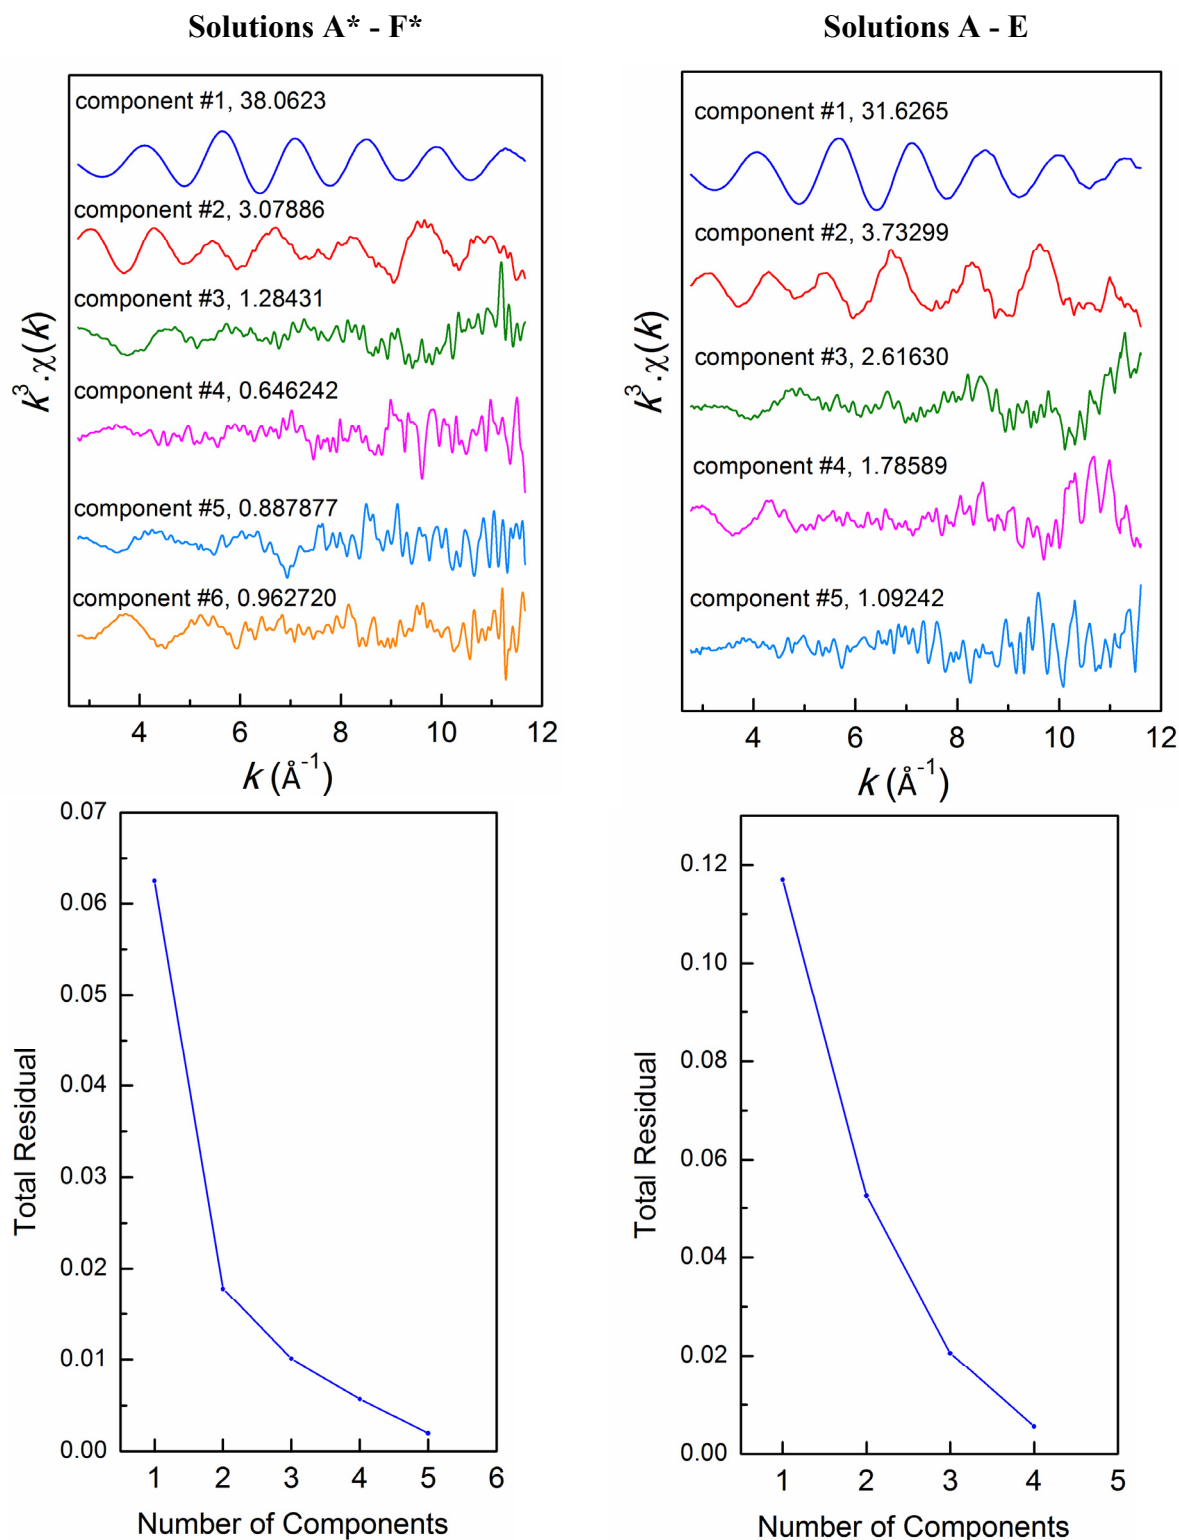

**Figure S-10.** (Top) Principal Component Analysis (PCA) of  $k^3$ -weighted, raw experimental EXAFS spectra of Pb(II) cysteine solutions A\* - F\* and A - E (for compositions, see Table 1), showing all the components and their corresponding eigenvalues. (Bottom) Total residual in the reconstructed spectra as a function of the number of components.



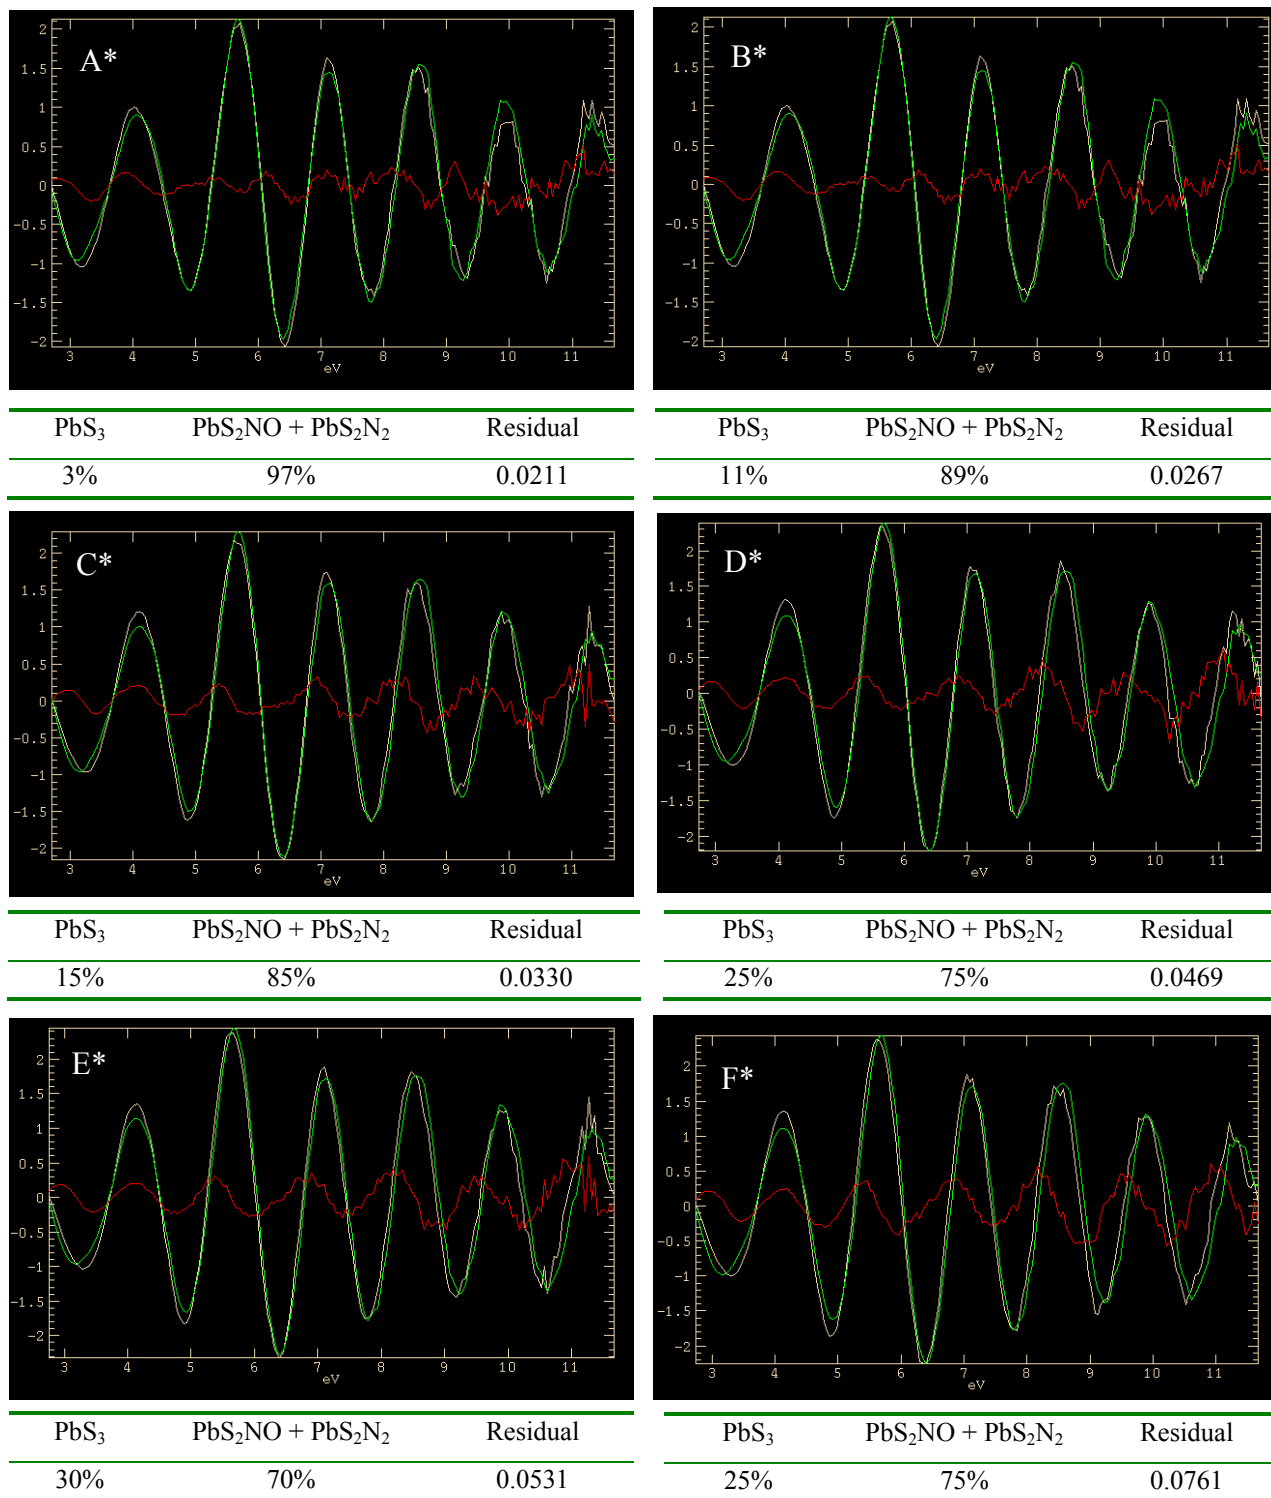

**Figure S-11a.** Linear combination of EXAFS oscillations for PbS<sub>2</sub>N(N/O) and PbS<sub>3</sub> models fitted (green) to the EXAFS spectra of Pb(II) cysteine solutions A\* - F\* (white) in  $k$ -range 2.7 – 11.7 Å<sup>-1</sup>; residual is shown in red.

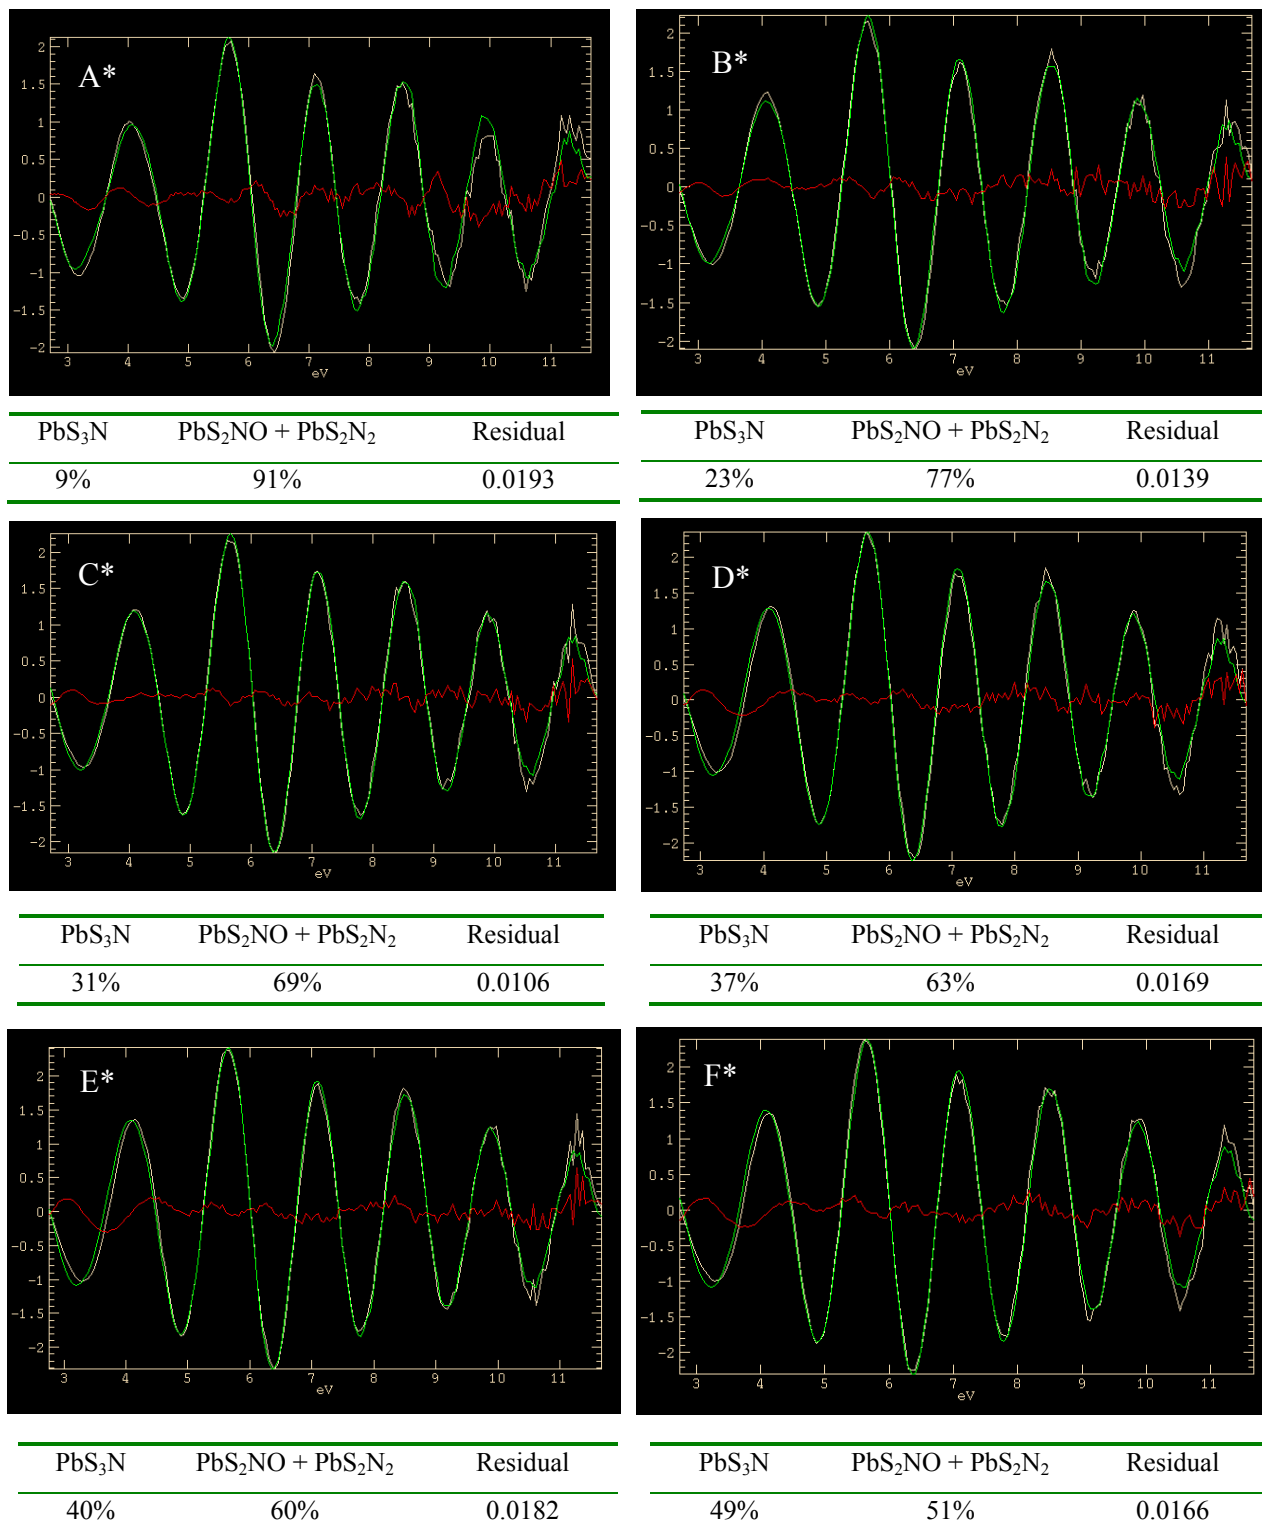

**Figure S-11b.** Linear combination of EXAFS oscillations for PbS<sub>2</sub>N(N/O) and PbS<sub>3</sub>N models fitted (green) to the EXAFS spectra of Pb(II) cysteine solutions A\* - F\* (white) in  $k$ -range 2.7 – 11.7 Å<sup>-1</sup>; residual is shown in red. Estimated error limit for the percentages obtained is ± 10-15%.

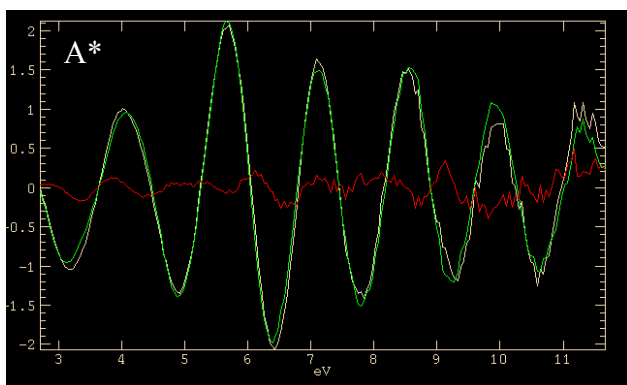

| PbS <sub>3</sub> N | PbS <sub>3</sub> | PbS <sub>2</sub> NO + PbS <sub>2</sub> N <sub>2</sub> | Residual |
|--------------------|------------------|-------------------------------------------------------|----------|
| 9%                 | 0%               | 91%                                                   | 0.0193   |

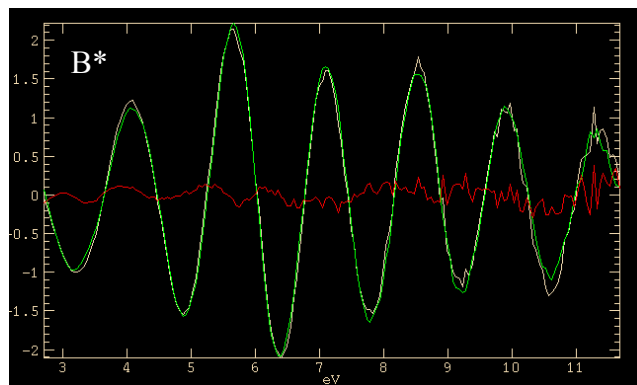

| PbS <sub>3</sub> N | PbS <sub>3</sub> | PbS <sub>2</sub> NO + PbS <sub>2</sub> N <sub>2</sub> | Residual |
|--------------------|------------------|-------------------------------------------------------|----------|
| 23%                | 4%               | 73%                                                   | 0.0136   |

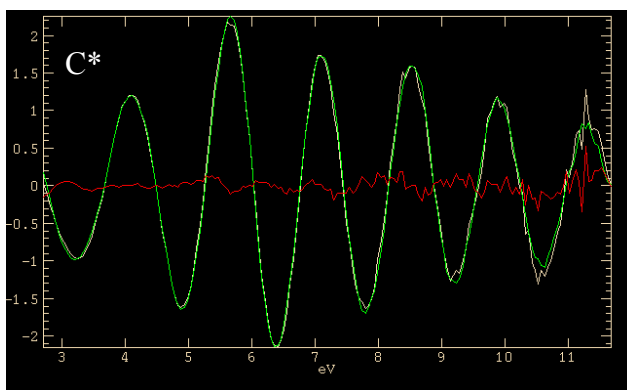

| PbS <sub>3</sub> N | PbS <sub>3</sub> | PbS <sub>2</sub> NO + PbS <sub>2</sub> N <sub>2</sub> | Residual |
|--------------------|------------------|-------------------------------------------------------|----------|
| 31%                | 6%               | 63%                                                   | 0.0102   |

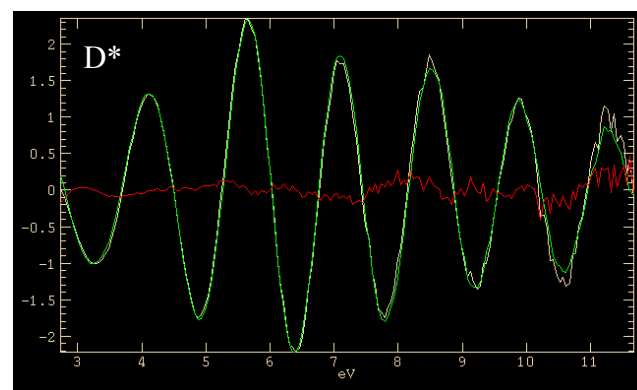

| PbS <sub>3</sub> N | PbS <sub>3</sub> | PbS <sub>2</sub> NO + PbS <sub>2</sub> N <sub>2</sub> | Residual |
|--------------------|------------------|-------------------------------------------------------|----------|
| 37%                | 15%              | 48%                                                   | 0.0139   |

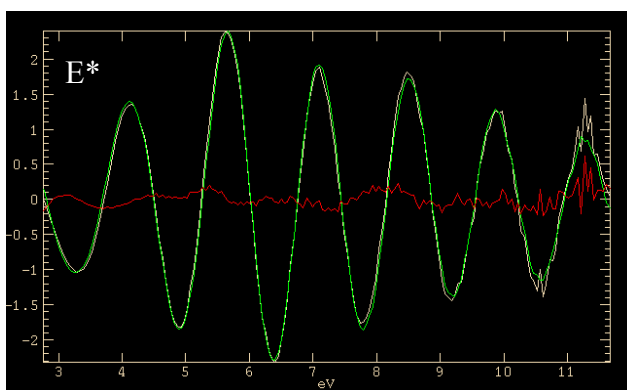

| PbS <sub>3</sub> N | PbS <sub>3</sub> | PbS <sub>2</sub> NO + PbS <sub>2</sub> N <sub>2</sub> | Residual |
|--------------------|------------------|-------------------------------------------------------|----------|
| 43%                | 18%              | 39%                                                   | 0.0132   |

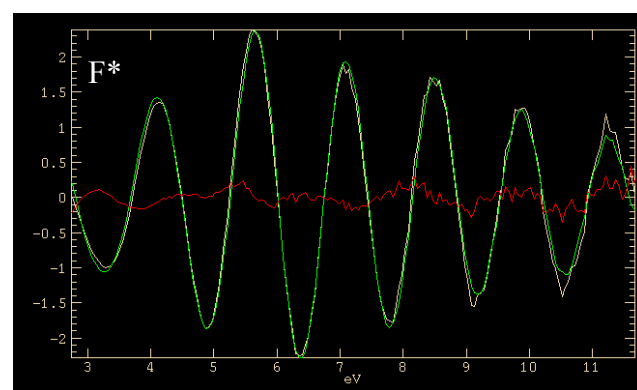

| PbS <sub>3</sub> N | PbS <sub>3</sub> | PbS <sub>2</sub> NO + PbS <sub>2</sub> N <sub>2</sub> | Residual |
|--------------------|------------------|-------------------------------------------------------|----------|
| 50%                | 10%              | 40%                                                   | 0.0152   |

**Figure S-11c.** Linear combination of EXAFS oscillations for PbS<sub>2</sub>N(N/O), PbS<sub>3</sub> and PbS<sub>3</sub>N models fitted (green) to the EXAFS spectra of Pb(II) cysteine solutions A\* - F\* (white) in  $k$ -range 2.7 – 11.7 Å<sup>-1</sup>; residual is shown in red.

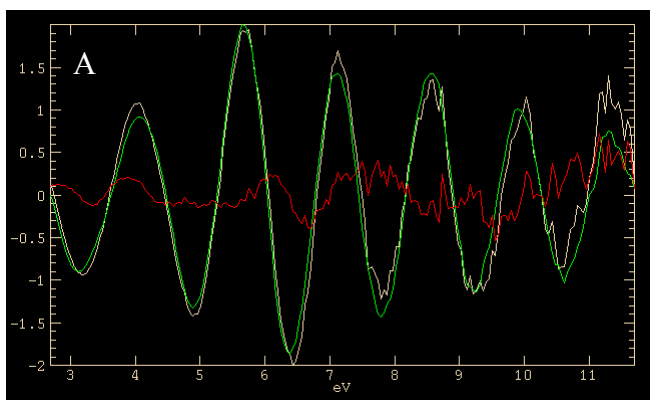

| PbS <sub>3</sub> N | PbS <sub>2</sub> NO + PbS <sub>2</sub> N <sub>2</sub> | Residual |
|--------------------|-------------------------------------------------------|----------|
| 11%                | 89%                                                   | 0.0460   |

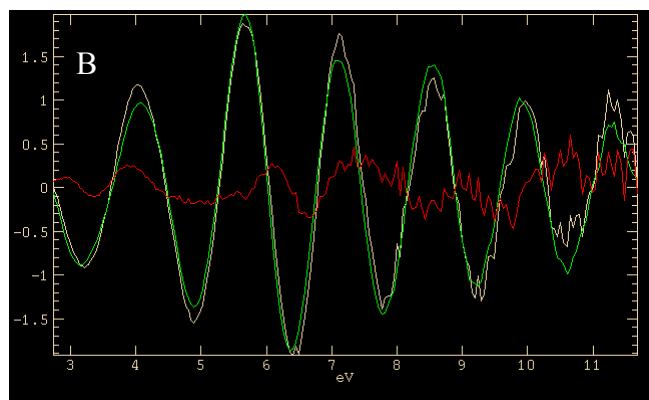

| PbS <sub>3</sub> N | PbS <sub>2</sub> NO + PbS <sub>2</sub> N <sub>2</sub> | Residual |
|--------------------|-------------------------------------------------------|----------|
| 20%                | 80%                                                   | 0.0393   |

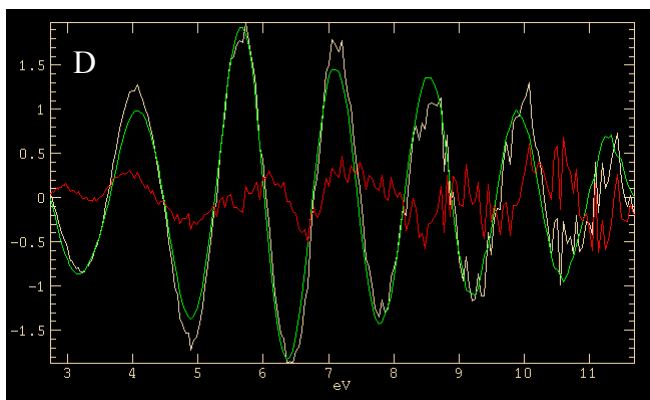

| PbS <sub>3</sub> N | PbS <sub>2</sub> NO + PbS <sub>2</sub> N <sub>2</sub> | Residual |
|--------------------|-------------------------------------------------------|----------|
| 26%                | 74%                                                   | 0.0559   |

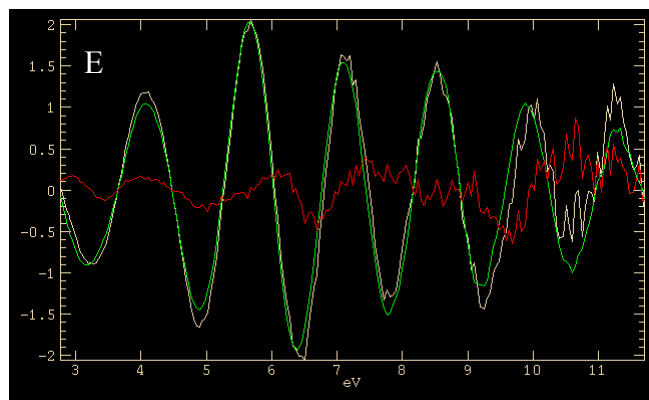

| PbS <sub>3</sub> N | PbS <sub>2</sub> NO + PbS <sub>2</sub> N <sub>2</sub> | Residual |
|--------------------|-------------------------------------------------------|----------|
| 27%                | 73%                                                   | 0.0549   |

**Figure S-11d.** Linear combination of EXAFS oscillations for PbS<sub>2</sub>N(N/O) and PbS<sub>3</sub>N models fitted (green) to the EXAFS spectra of Pb(II) cysteine solutions A - E (white) in  $k$ -range 2.7 – 11.7 Å<sup>-1</sup>; residual is shown in red. Estimated error limit for the percentages obtained is ± 10-15%.

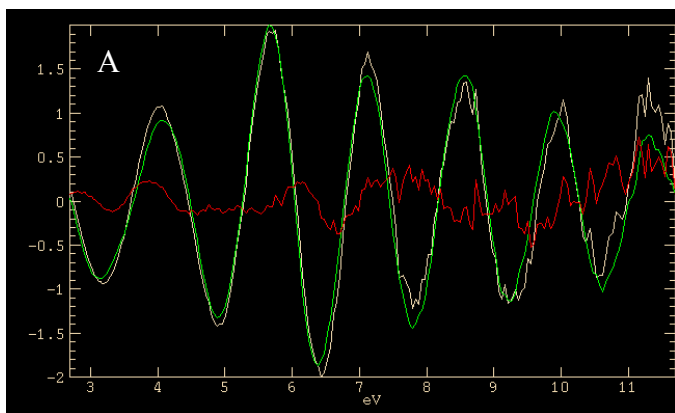

| PbS <sub>3</sub> N | PbS <sub>3</sub> | PbS <sub>2</sub> NO + PbS <sub>2</sub> N <sub>2</sub> | Residual |
|--------------------|------------------|-------------------------------------------------------|----------|
| 10%                | 4%               | 86%                                                   | 0.0458   |

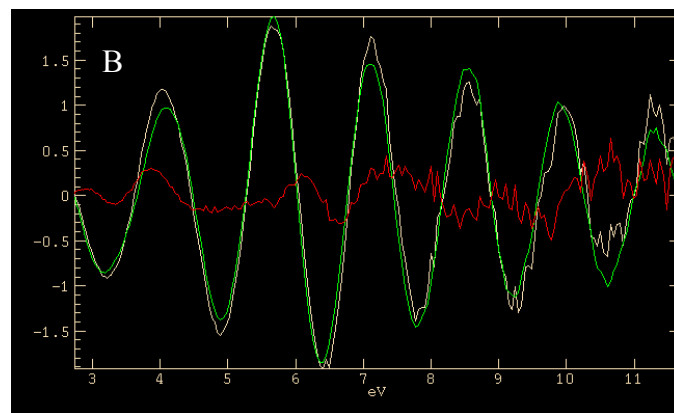

| PbS <sub>3</sub> N | PbS <sub>3</sub> | PbS <sub>2</sub> NO + PbS <sub>2</sub> N <sub>2</sub> | Residual |
|--------------------|------------------|-------------------------------------------------------|----------|
| 18%                | 8%               | 74%                                                   | 0.0385   |

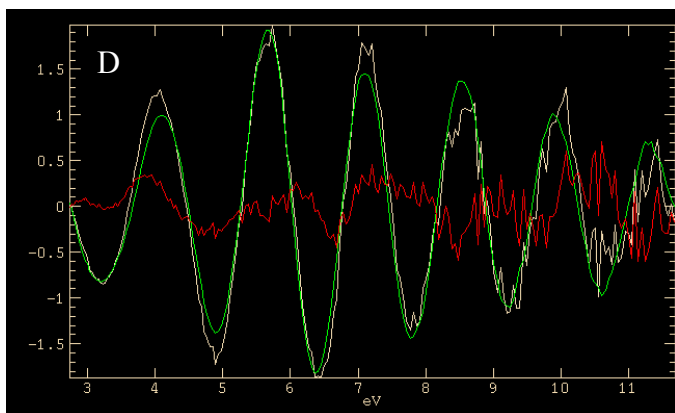

| PbS <sub>3</sub> N | PbS <sub>3</sub> | PbS <sub>2</sub> NO + PbS <sub>2</sub> N <sub>2</sub> | Residual |
|--------------------|------------------|-------------------------------------------------------|----------|
| 23%                | 12%              | 65%                                                   | 0.0543   |

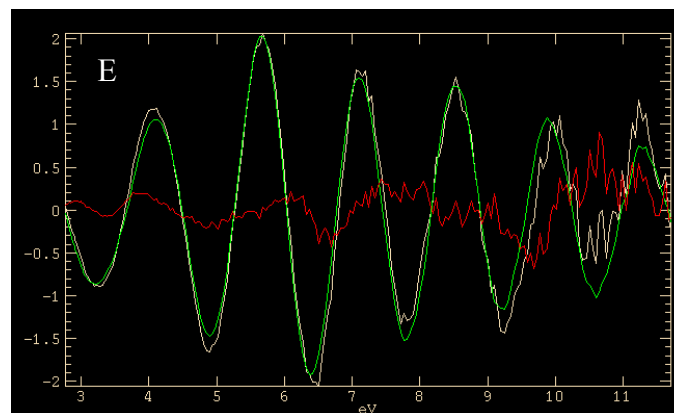

| PbS <sub>3</sub> N | PbS <sub>3</sub> | PbS <sub>2</sub> NO + PbS <sub>2</sub> N <sub>2</sub> | Residual |
|--------------------|------------------|-------------------------------------------------------|----------|
| 25%                | 12%              | 63%                                                   | 0.0532   |

**Figure S-11e.** Linear combination of EXAFS oscillations for PbS<sub>2</sub>N(N/O), PbS<sub>3</sub> and PbS<sub>3</sub>N models fitted (green) to the EXAFS spectra of Pb(II) cysteine solutions A - E (white) in  $k$ -range 2.7 – 11.7 Å<sup>-1</sup>; residual is shown in red.

**Table S-3.** Results of fitting the raw,  $k^3$ -weighted Pb L<sub>III</sub>-edge EXAFS spectra of Pb(II) cysteine solutions A\* - F\* and A – E with linear combinations of EXAFS oscillations for PbS<sub>2</sub>N(N/O), PbS<sub>3</sub>N and PbS<sub>3</sub> models (see Figures S-11c and S-11e).<sup>a</sup>

| Solution (H <sub>2</sub> Cys/Pb <sup>II</sup><br>mole ratio) | $\delta(^{207}\text{Pb})$<br>ppm | PbS <sub>2</sub> NO + PbS <sub>2</sub> N <sub>2</sub><br>(%) | PbS <sub>3</sub> N<br>(%) | PbS <sub>3</sub><br>(%) |
|--------------------------------------------------------------|----------------------------------|--------------------------------------------------------------|---------------------------|-------------------------|
| <b>A</b> (2.1)                                               | 2006                             | 86                                                           | 10                        | 4                       |
| <b>B</b> (3.0)                                               | 2112                             | 74                                                           | 18                        | 8                       |
| <b>D</b> (5.0)                                               | 2229                             | 65                                                           | 23                        | 12                      |
| <b>E</b> (8.0)                                               | 2310                             | 63                                                           | 25                        | 12                      |
| <b>A*</b> (2.0)                                              | 2010                             | 91                                                           | 9                         | 0                       |
| <b>B*</b> (3.0)                                              | 2219                             | 73                                                           | 23                        | 4                       |
| <b>C*</b> (4.0)                                              | 2316                             | 63                                                           | 31                        | 6                       |
| <b>D*</b> (5.0)                                              | 2350                             | 48                                                           | 37                        | 15                      |
| <b>E*</b> (8.0)                                              | 2418                             | 39                                                           | 43                        | 18                      |
| <b>F*</b> (10.0)                                             | 2507                             | 40                                                           | 50                        | 10                      |

<sup>a</sup> Raw  $k^3$ -weighted EXAFS spectra of 0.1 M lead(II) solutions containing penicillamine ( $C_{\text{H}_2\text{Pen}} = 0.3$  M; pH = 9.6), or *N*-acetylcysteine ( $C_{\text{H}_2\text{NAC}} = 1.0$  M, pH = 9.1) were used for the PbS<sub>2</sub>N(N/O) and PbS<sub>3</sub> species, respectively. The EXAFS oscillation for PbS<sub>3</sub>N was theoretically simulated (see text). Estimated error limit of the relative amounts is  $\pm 10 - 15\%$ .

**Table S-4.** Least-squares curve-fitting of the  $k^3$ -weighted EXAFS spectra for Pb(II)-cysteine alkaline aqueous solutions A – B ( $C_{\text{Pb(II)}} = 10$  mM) and A\*, B\* and F\* ( $C_{\text{Pb(II)}} = 100$  mM), containing different H<sub>2</sub>Cys/ Pb(II) mole ratios (Table 1), using different fitting models. <sup>a</sup>

| Solution | Model     | Pb-(N/O)   |         |                              | Pb-S       |         |                              | $\Delta E_0$ | $\mathcal{R}^b$ |
|----------|-----------|------------|---------|------------------------------|------------|---------|------------------------------|--------------|-----------------|
|          |           | $N$        | $R$ (Å) | $\sigma^2$ (Å <sup>2</sup> ) | $N$        | $R$ (Å) | $\sigma^2$ (Å <sup>2</sup> ) |              |                 |
| <b>A</b> | <b>I</b>  | 2 <i>f</i> | 2.410   | 0.0206                       | 2 <i>f</i> | 2.638   | 0.0058                       | -1.1         | 20.0            |
|          | <b>II</b> | 2 <i>f</i> | 2.400   | 0.0143                       | 1.6        | 2.641   | 0.0043                       | -0.9         | 19.5 *          |
| <b>B</b> | <b>I</b>  | 2 <i>f</i> | 2.431   | 0.0170                       | 2 <i>f</i> | 2.643   | 0.0062                       | -0.1         | 14.0            |
|          | <b>II</b> | 2 <i>f</i> | 2.430   | 0.0165                       | 2.0        | 2.644   | 0.0061                       | -0.1         | 14.0 *          |

  

| Solution  | Model                  | Pb-(N/O)     |         |                              | Pb-S         |         |                              | $\Delta E_0$ | $\mathcal{R}^b$ |
|-----------|------------------------|--------------|---------|------------------------------|--------------|---------|------------------------------|--------------|-----------------|
|           |                        | $N$          | $R$ (Å) | $\sigma^2$ (Å <sup>2</sup> ) | $N$          | $R$ (Å) | $\sigma^2$ (Å <sup>2</sup> ) |              |                 |
| <b>A*</b> | <b>I</b>               | 2 <i>f</i>   | 2.417   | 0.0199                       | 2 <i>f</i>   | 2.639   | 0.0055                       | -1.4         | 22.0            |
|           | <b>II</b>              | 2 <i>f</i>   | 2.416   | 0.0201                       | 2.0          | 2.639   | 0.0055                       | -1.4         | 22.0 *          |
|           | <b>III</b>             | 1 <i>f</i>   | 2.335   | 0.0081                       | 2 <i>f</i>   | 2.636   | 0.0055                       | -1.2         | 21.9            |
| <b>B*</b> |                        | 1 <i>f</i>   | 2.503   | 0.0081 <sup>c</sup>          |              |         |                              |              |                 |
|           | <b>I</b>               | 2 <i>f</i>   | 2.425   | 0.0177                       | 2 <i>f</i>   | 2.652   | 0.0050                       | 0            | 18.2            |
|           | <b>II</b>              | 2 <i>f</i>   | 2.429   | 0.0237                       | 2.3          | 2.649   | 0.0059                       | -0.4         | 18.0 *          |
|           | <b>III</b>             | 1 <i>f</i>   | 2.332   | 0.0143                       | 2 <i>f</i>   | 2.649   | 0.0050                       | -0.3         | 18.1            |
| <b>F*</b> |                        | 1 <i>f</i>   | 2.496   | 0.0143 <sup>c</sup>          |              |         |                              |              |                 |
|           | <b>IV</b>              | 1.5 <i>f</i> | 2.452   | 0.0290                       | 2.9          | 2.662   | 0.0064                       | 1.1          | 12.9            |
|           | <b>V<sup>d</sup></b>   | 1.5 <i>f</i> | 2.429   | 0.0185                       | 2.5 <i>f</i> | 2.663   | 0.0055                       | 1.2          | 13.0*           |
|           | <b>VI</b>              | 1 <i>f</i>   | 2.391   | 0.0200                       | 2.8          | 2.661   | 0.0062                       | 0.4          | 12.9            |
|           | <b>VII<sup>e</sup></b> | 1 <i>f</i>   | 2.403   | 0.0134                       | 2.5 <i>f</i> | 2.662   | 0.0054                       | 0.7          | 13.0            |

<sup>a</sup>  $S_0^2 = 0.9$  fixed (obtained from fitting the EXAFS spectrum of solid PbPen) [33];  $k$ -range = 2.7 – 11.7 Å<sup>-1</sup>;  $f$  = fixed value;  $R \pm 0.04$  Å;  $\sigma^2 \pm 0.002$  Å<sup>2</sup>; <sup>b</sup> The residual (%) from the least-squares curve fitting is defined as:

$$\frac{\sum_{i=1}^N |y_{\text{exp}}(i) - y_{\text{theo}}(i)|}{\sum_{i=1}^N |y_{\text{exp}}(i)|} \times 100$$

where  $y_{\text{exp}}$  and  $y_{\text{theo}}$  are experimental and theoretical data points, respectively; <sup>c</sup> correlated; <sup>d</sup> assuming a 50:50% mixture of PbS<sub>2</sub>N(N/O) and PbS<sub>3</sub>N coordination environments; <sup>e</sup> assuming a 50:50% mixture of PbS<sub>2</sub>N(N/O) and PbS<sub>3</sub> coordination. \* Selected model for Table 4 and Figure 6.

**Table S-5.** Least-squares curve-fitting of the  $k^3$ -weighted EXAFS spectra for crystalline  $\text{Pb}(\text{aet})_2$  <sup>a</sup>

| Model      | Path              | $N$        | $R$ (Å) | $\sigma^2$ (Å <sup>2</sup> ) | $S_0^2$                   | $\Delta E_0$ | $\mathcal{R}$ |
|------------|-------------------|------------|---------|------------------------------|---------------------------|--------------|---------------|
| <b>I</b>   | Pb-(N/O)          | 2 <i>f</i> | 2.538   | 0.0040                       | 0.9 <i>f</i> <sup>b</sup> | 3.5          | 20.7          |
|            | Pt-S              | 2 <i>f</i> | 2.632   | 0.0069                       |                           |              |               |
|            | Pt-C              | 4 <i>f</i> | 3.437   | 0.0156                       |                           |              |               |
| <b>II</b>  | Pb-(N/O)          | 2 <i>f</i> | 2.532   | 0.0020                       | 0.9 <i>f</i> <sup>b</sup> | 1.9          | 20.0          |
|            | Pt-S <sup>c</sup> | 2.8        | 2.615   | 0.0099                       |                           |              |               |
|            | Pt-C              | 4 <i>f</i> | 3.406   | 0.0158                       |                           |              |               |
| <b>III</b> | Pb-(N/O)          | 2 <i>f</i> | 2.540   | 0.0033                       | 1.0 <i>f</i>              | 3.3          | 20.4          |
|            | Pt-S              | 2 <i>f</i> | 2.623   | 0.0078                       |                           |              |               |
|            | Pt-C              | 4 <i>f</i> | 3.437   | 0.0174                       |                           |              |               |

<sup>a</sup> Mixed 50:50 (w/w) with boron nitride;  $\text{Pb}(\text{aet})_2$  crystal structure [25] was used as FEFF model;  $k$ -range = 2.7 – 12.4 Å<sup>-1</sup>;  $f$  = fixed;  $R \pm 0.04$  Å;  $\sigma^2 \pm 0.002$  Å<sup>2</sup>; <sup>b</sup>  $S_0^2 = 0.9$  fixed (obtained from fitting EXAFS spectrum of solid  $\text{PbPen}$ ) [33]. <sup>c</sup> Simultaneous refinement of coordination number and  $\sigma^2$  for the Pb-S path shows the strong correlation between these parameters, which contribute in the EXAFS amplitude.

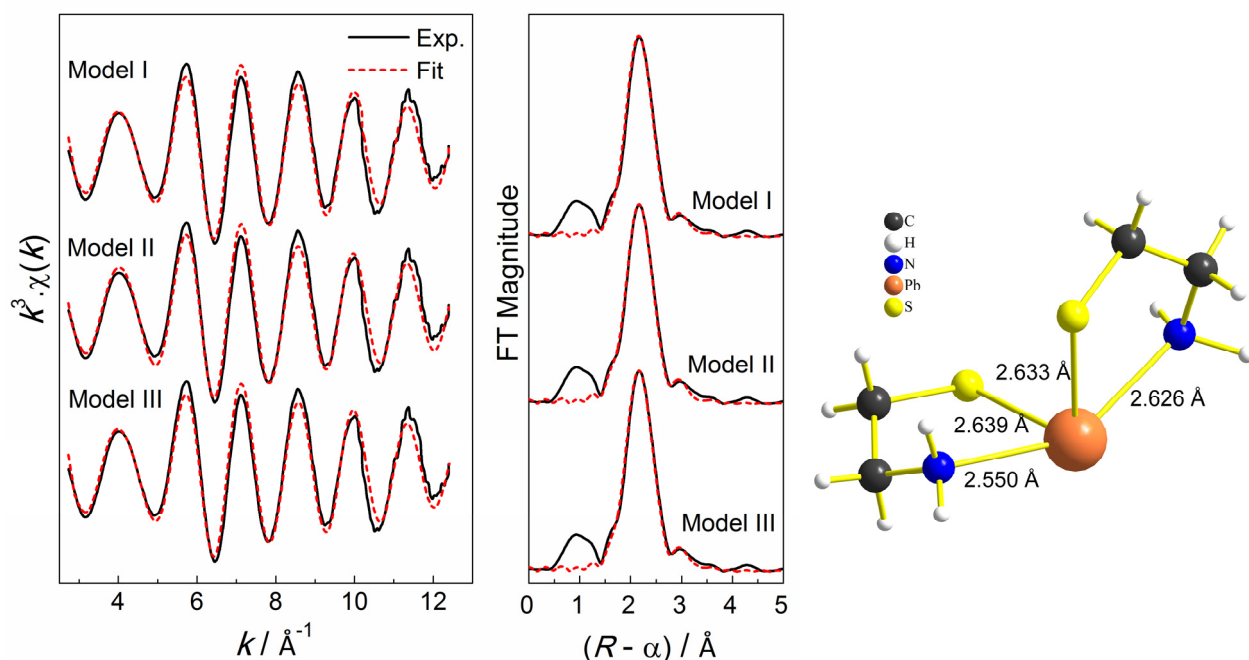

**Figure S-12.** EXAFS fitting results for crystalline  $\text{Pb}(\text{aet})_2$  (see Table S-5); structure from *Ref. 25*



**Table S-6.** Survey of Pb(II) complexes with PbS<sub>3</sub>N coordination in CSD version 5.35 (Nov 2013)

|   | <i>CSD Code</i> | <i>Pb-S (Å)</i>         | <i>Pb-N (Å)</i> | <i>Reference</i>                                                                                                   |
|---|-----------------|-------------------------|-----------------|--------------------------------------------------------------------------------------------------------------------|
| 1 | XIRBUW          | 2.626<br>2.664<br>3.174 | 2.571           | G.G. Briand, A.D. Smith, G. Schatte, A.J. Rossini, R.W. Schurko <i>Inorg. Chem.</i> <b>2007</b> , <i>46</i> , 8625 |
| 2 | XIRCAD          | 2.618<br>2.648<br>3.267 | 2.497           | G.G. Briand, A.D. Smith, G. Schatte, A.J. Rossini, R.W. Schurko <i>Inorg. Chem.</i> <b>2007</b> , <i>46</i> , 8625 |
| 3 | PAQVOT          | 2.704<br>2.892<br>3.086 | 2.411           | M. S. Bharara; C. H. Kim; S. Parkin; D.A. Atwood <i>Polyhedron</i> <b>2005</b> , <i>24</i> , 865-871               |
|   | Pb-X Range      | 2.618 – 3.267           | 2.411 – 2.571   |                                                                                                                    |
|   | Average         | 2.853                   | 2.493           |                                                                                                                    |
